# Supplementary material
Source: PubMed Central journal article supplement (PMC5880214)

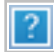

Supplement: NIHMS950837-supplement-Sup__Fig__1.pdf [file NIHMS950837-supplement-Sup__Fig__1.pdf]



Supplement: NIHMS950837-supplement-Sup__Fig__2.pdf [file NIHMS950837-supplement-Sup__Fig__2.pdf]



Supplement: NIHMS950837-supplement-Sup__Fig__3.pdf [file NIHMS950837-supplement-Sup__Fig__3.pdf]
